# Supplementary material for: Changes in global and thalamic brain connectivity in LSD-induced altered states of consciousness are attributable to the 5-HT2A receptor
Source: eLife. 2018 Oct 25;7:e35082. doi: 10.7554/eLife.35082 (PMC6202055; doi:10.7554/eLife.35082)
Supplement: Figure 5—source data 1. [file elife-35082-fig5-data1.xlsx]

## Sheet: Tabelle1
Placebo_180_Spiritual_experience	Placebo_180_Blissful_state	Placebo_180_Disembodiment	Placebo_180_Elementary_imagery	Placebo_180_Changed_meaning_of_percepts	Placebo_250_Spiritual_experience	Placebo_250_Blissful_state	Placebo_250_Disembodiment	Placebo_250_Elementary_imagery	Placebo_250_Changed_meaning_of_percepts	Placebo_360_Spiritual_experience	Placebo_360_Blissful_state	Placebo_360_Disembodiment	Placebo_360_Elementary_imagery	Placebo_360_Changed_meaning_of_percepts	Ket_LSD_180_Spiritual_experience	Ket_LSD_180_Blissful_state	Ket_LSD_180_Disembodiment	Ket_LSD_180_Elementary_imagery	Ket_LSD_180_Changed_meaning_of_percepts	Ket_LSD_250_Spiritual_experience	Ket_LSD_250_Blissful_state	Ket_LSD_250_Disembodiment	Ket_LSD_250_Elementary_imagery	Ket_LSD_250_Changed_meaning_of_percepts	Ket_LSD_360_Spiritual_experience	Ket_LSD_360_Blissful_state	Ket_LSD_360_Disembodiment	Ket_LSD_360_Elementary_imagery	Ket_LSD_360_Changed_meaning_of_percepts	LSD_180_Spiritual_experience	LSD_180_Blissful_state	LSD_180_Disembodiment	LSD_180_Elementary_imagery	LSD_180_Changed_meaning_of_percepts	LSD_250_Spiritual_experience	LSD_250_Blissful_state	LSD_250_Disembodiment	LSD_250_Elementary_imagery	LSD_250_Changed_meaning_of_percepts	LSD_360_Spiritual_experience	LSD_360_Blissful_state	LSD_360_Disembodiment	LSD_360_Elementary_imagery	LSD_360_Changed_meaning_of_percepts
0	0	0	0	2.33333	0	4	0	0	0	0	0	0	0	0	0	0	0	0	0	0	0	0	0	0	0	0	0	0	0	10.6667	82.3333	80.6667	66.6667	75.6667	0	11.6667	5.33333	17	19.3333	6	19	14.6667	45	23
0	0	0.666666	0.666666	0.666666	0.666666	0.333333	0.333333	0.333333	0.333333	0	0.666666	0.333333	0	0.333333	0.666666	0	0.666666	0	0.666666	1	0.333333	0.666666	0	0	0.333333	0.333333	0	0	0.333333	100	100	100	100	100	100	78.3333	99.6667	100	100	100	86.3333	100	100	99.3333
0	0	0	0	0	0	0	0	0	0	0	0	0	0	0	0	0	0	0	0	0	0	0	0	0	0	0	0	0	0	0	20.3333	100	25	12.6667	0	14.6667	35.3333	0	13.6667	0	5	17	5.66667	0
0.333333	0	0	0	0	0	0.333333	0	0	0	0	0	0	0	0	0	0	0	0	0.333333	0.333333	0.666666	0.333333	0	0	0.333333	0	0	0.333333	0	0.333333	2.33333	69.6667	95.6667	59.3333	0	4.66667	15.3333	95	17.6667	0	0.666666	19	79	11.3333
0	0	0	0	0	0	0	0	0	0	0	0	0	0	0	0	2	6	0	0	0	0	0	0	0	0	0	0	0	0	15.3333	77.6667	74.6667	88.6667	87.3333	0	5.66667	8.33333	43	17.6667	0	1.33333	1.33333	11.3333	1.33333
5	0.333333	27.6667	0.333333	5	0	0.666666	1	0	11.3333	0	0.333333	3.33333	0	2	0.333333	2	21	2	0.666666	0.333333	0	0	0	0.333333	0	0	0	0	0	88.3333	72.6667	87.6667	74.3333	94.6667	85	66.6667	96.6667	67.3333	69.6667	76.6667	60.6667	98.3333	63.3333	84
0	0	1.66667	0	1.33333	0	0	0	0	0	0	0	2.33333	0	0	0	2.33333	2.66667	4	1.66667	0	0	0	0	0	0	0	2	2.33333	0	0.666666	6.66667	43.6667	23.3333	32	0.333333	5.66667	38.3333	27	24	0	6.66667	29.3333	13	16
0	3.66667	0	9	0	0	0	0	0	0	0	0	0	2.66667	0	0	0	0	0	0	0	0	1.66667	0	0	0	0	0.333333	0	0	24	79.6667	84	97.6667	87.6667	22.6667	82	63	89	94	20.3333	55.3333	23	59.3333	53.3333
0	0	0	0	4	0	0	0	0	0	0	0	0	0	0	0	0	0	0	0	0	0	0	0	0	0	0	0	0	0	9.66667	37	67.3333	47	53	0	0	0	0	6.33333	0.333333	0	0	0	0
0	0	9.66667	0	0	0	0	0	0	0	0	0	0	0	0	0	0	0	0	0	0	0	0	0	0	0	0	0	0	0	29.3333	55	47	59.3333	38.6667	15.3333	47.3333	51.6667	52.6667	16	41.6667	55.3333	62.3333	66.3333	23
1.33333	8.33333	4.66667	20.6667	0.666666	2.33333	13	1.66667	1.33333	3.66667	2.33333	11	6.66667	16.3333	1	4	25.6667	33.3333	31.3333	8.66667	4.33333	24.3333	24.3333	20	9	2	19.6667	3.66667	15	3	65.3333	19	64	75	66.6667	31	61.6667	75.6667	45	76.3333	45	77.6667	70.3333	78	64
0	0	0	0	0	0	0	0	0	0	0	0	0	0	0	0	0	0	0	0	0	0	0	0	0	0	0	0	0	0	42.6667	60.3333	33	25.6667	77.6667	22.6667	41.6667	27.3333	1	35.3333	25.3333	40	33.6667	22.6667	36.6667
0	7	0	0	0	0	0	0	0	0	0	6.66667	0	0	0	0	21.6667	8	3	3.33333	0	2.66667	0	0	0	0	2.33333	0	0	0	42.3333	100	100	91.3333	51.3333	0	72.6667	65	82	44.3333	33.3333	81.3333	90.6667	95.6667	45.6667
0	0	0	0	0	0	0	0	0	0	0	0	0	0	0	0	0	0	0	0	0	0	0	0	0	0	0	0	0	0	0	86.6667	10.3333	66.6667	15.6667	0	9	19	0	3	0	1.33333	3.33333	2	0
0	0	0	0	0	0	3.66667	0	0	0	0	0	0	0	0	0	24.6667	3.33333	0	2.33333	0	8.66667	2.33333	0	0	0	3	0	0	0	0	100	78.3333	41.3333	49.6667	0	64.6667	31	0	22.6667	0	12	3.33333	0	4
0	0	0	0	0	0	0	0	0	0	0	0	0	0	0	0	0	0	0	0	0	0	0	0	0	0	0	0	0	0	0	3	0	8.66667	5.33333	0	4.66667	0	34.3333	0	0	0	0	15.3333	0
0	0	1.33333	0	0	0	1.33333	0	0	0	0	0	0	0	0	0	0	1.66667	0	0	0	0	0.333333	0	0.333333	0	0	2	0	0	22.3333	21	63.6667	18	12	0	0	28.3333	7	3.33333	0	3.33333	0	5.66667	0.333333
0.666666	3.66667	18.3333	1.66667	1	0.666666	3	3	0	0	0	0.666666	2.33333	0	0	0.333333	0.666666	2.33333	0.333333	0	0	0.666666	0	0	0	0	0.333333	0	0	0	59.6667	75	73.3333	96	71.6667	34.6667	55.3333	5	19.6667	12.3333	9.33333	7.33333	13	38.3333	3.33333
0	0	0	0	0	0	0	0	0	0	0	0	0	0	0	0	0	0	0	0	0	0	0	0	0	0	0	0	0	0	0	41	20.3333	30	42	0	30.6667	28.6667	47.6667	14.3333	0	41.3333	47.3333	38.6667	4
0.333333	0	0.333333	0	0	0	0.666666	0.333333	0.666666	0.333333	0.333333	0.333333	0.333333	0.333333	0.333333	1	0	0.333333	0	0	1.33333	1	0	1	0.333333	1	0.666666	0.333333	0.666666	0.666666	18.3333	33.3333	88	86	38.6667	19.6667	33	66.6667	18	14.6667	20	44.3333	75.3333	33.3333	31.6667
0	0	3.33333	4	0	0	0	0.666666	0	0	0.666666	0.333333	0	0	0.333333	0.333333	0	0	10.3333	6	0.333333	0	0	0.333333	0	0.666666	0	0	10.6667	0	36.3333	67	100	100	84.6667	59.3333	83	100	100	100	28.6667	29	100	100	82.6667
0	0	8	2.66667	0	0	0	0	0	0	0	0	0.666666	0	0	0	0	28.6667	1.33333	0	0	0	0	0	0	0	0	6	0	0	4.66667	6.66667	20.3333	50.3333	84.6667	3.66667	32.3333	63.6667	39.3333	37	0	0	24	68.3333	36.6667
0	0	0	0	0	0	0	0	0	0	0	0	0	0	0	0	0	0	0	0	0	0	0	0	0			0	0	0	69.3333	98.6667	93.3333	67.3333	84	66	75	65.3333	10.3333	45	33	41.6667	42.6667	33.6667	82
0.333333	0	0	0	0	0.666666	0.333333	0	0	0.333333	0.333333	0.333333	0	0.333333	0	0.333333	0.333333	2.33333	0	0	0	0	0	0	0	0	0	0	0	0	0.333333	55.6667	93.3333	67	50	0	20.3333	33	74.3333	48	0	7	17.6667	18.6667	6.33333
